# Supplementary material
Source: PubMed Central journal article supplement (PMC6008038)
Supplement: jgme-10-03-08_s01.pdf [file jgme-10-03-08_s01.pdf]

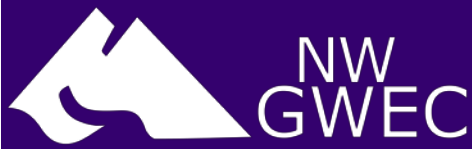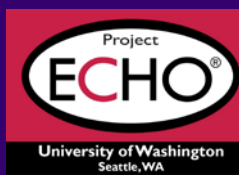

Bennett KA, Ong T, Verrall AM, et al. Project ECHO-Geriatrics: Training Future Primary Care Providers to Meet the Needs of Older Adults. *J Grad Med Educ.* 2018;10(3):311-316.

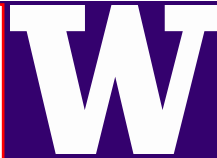

## Project ECHO – Geriatrics - Evaluation Survey

Session: \_\_\_\_\_

Didactic: \_\_\_\_\_

Presenter: \_\_\_\_\_

How would you rate the following? (Please check a box)

- |                                                                                                                   | <u>Low</u>                              |                                       |                                       |                                           | <u>High</u>                            |
|-------------------------------------------------------------------------------------------------------------------|-----------------------------------------|---------------------------------------|---------------------------------------|-------------------------------------------|----------------------------------------|
| 1. Overall satisfaction with this session                                                                         | <input type="checkbox"/> 1              | <input type="checkbox"/> 2            | <input type="checkbox"/> 3            | <input type="checkbox"/> 4                | <input type="checkbox"/> 5             |
| 2. Overall satisfaction with the didactic presenter                                                               | <input type="checkbox"/> 1              | <input type="checkbox"/> 2            | <input type="checkbox"/> 3            | <input type="checkbox"/> 4                | <input type="checkbox"/> 5             |
| 3. Satisfaction with the talk                                                                                     | <input type="checkbox"/> 1              | <input type="checkbox"/> 2            | <input type="checkbox"/> 3            | <input type="checkbox"/> 4                | <input type="checkbox"/> 5             |
| 4. Satisfaction with the overall technology experience                                                            | <input type="checkbox"/> 1              | <input type="checkbox"/> 2            | <input type="checkbox"/> 3            | <input type="checkbox"/> 4                | <input type="checkbox"/> 5             |
| 5. Rate your overall satisfaction with the case discussions                                                       | <input type="checkbox"/> 1              | <input type="checkbox"/> 2            | <input type="checkbox"/> 3            | <input type="checkbox"/> 4                | <input type="checkbox"/> 5             |
| 6. Rate your <u>knowledge</u> of this subject <u>before</u> this session                                          | <input type="checkbox"/> 1              | <input type="checkbox"/> 2            | <input type="checkbox"/> 3            | <input type="checkbox"/> 4                | <input type="checkbox"/> 5             |
| 7. Rate your <u>knowledge</u> of this subject <u>after</u> this session                                           | <input type="checkbox"/> 1              | <input type="checkbox"/> 2            | <input type="checkbox"/> 3            | <input type="checkbox"/> 4                | <input type="checkbox"/> 5             |
| 8. How much will the information in this session change the way you practice geriatric health care?               |                                         |                                       |                                       |                                           |                                        |
|                                                                                                                   | <input type="checkbox"/> Not at all (1) | <input type="checkbox"/> A little (2) | <input type="checkbox"/> Somewhat (3) | <input type="checkbox"/> Considerably (4) | <input type="checkbox"/> Very much (5) |
| 9. As a result of this session, do you plan to do anything differently in how you practice geriatric health care? |                                         |                                       |                                       |                                           |                                        |
|                                                                                                                   | <input type="checkbox"/> YES            | <input type="checkbox"/> NO           |                                       |                                           |                                        |
| 10. If <u>YES</u> , what would you plan to change?                                                                |                                         |                                       |                                       |                                           |                                        |

---



---

11. Any suggestions for future geriatric education topics/speakers?

---

Please tell us about the technology during the sessions:

12. How did you join the Project ECHO Geriatrics video conferencing?

- |                                                        |                                                 |
|--------------------------------------------------------|-------------------------------------------------|
| <input type="checkbox"/> Group Webcam                  | <input type="checkbox"/> Tablet (iPad, etc.)    |
| <input type="checkbox"/> Personal laptop with a webcam | <input type="checkbox"/> Audio-only (no webcam) |
| <input type="checkbox"/> Smartphone                    | <input type="checkbox"/> Other: _____           |
| <input type="checkbox"/> Desktop with a webcam         |                                                 |

13. Please describe any technical difficulties you experienced during the sessions:

---

14. Is there anything else you'd like to share with us?

---

**Thank you for your feedback!**
